# Supplementary material for: Nusinersen Induces Disease-Severity-Specific Neurometabolic Effects in Spinal Muscular Atrophy
Source: MDPI journal article supplement (doi:10.3390/biom12101431), 2022-10-06
Supplement: s1 [file s1]

Article

# Nusinersen Induces Disease-Severity-Specific Neurometabolic Effects in Spinal Muscular Atrophy

Francesco Errico <sup>1,2,†</sup>, Carmen Marino <sup>3,†</sup>, Manuela Grimaldi <sup>3,†</sup>, Tommaso Nuzzo <sup>1,4,†</sup>, Valentina Bassareo <sup>5</sup>, Valeria Valsecchi <sup>6</sup>, Chiara Panicucci <sup>7</sup>, Elia Di Schiavi <sup>8</sup>, Tommaso Mazza <sup>9</sup>, Claudio Bruno <sup>7,10</sup>, Adele D'Amico <sup>11</sup>, Manolo Carta <sup>5</sup>, Anna Maria D'Ursi <sup>3,\*</sup>, Enrico Bertini <sup>11</sup>, Livio Pellizzoni <sup>12,13,14</sup> and Alessandro Usiello <sup>1,4,\*</sup>

<sup>1</sup> Laboratory of Translational Neuroscience, Ceinge Biotechnologie Avanzate, 80145 Naples, Italy

<sup>2</sup> Department of Agricultural Sciences, University of Naples "Federico II", 80055 Portici, Italy

<sup>3</sup> Department of Pharmacy, University of Salerno, 84084 Fisciano, Salerno, Italy

<sup>4</sup> Department of Environmental, Biological and Pharmaceutical Science and Technologies, Università degli Studi della Campania "Luigi Vanvitelli", 81100 Caserta, Italy

<sup>5</sup> Department of Biomedical Sciences, University of Cagliari, 09042 Monserrato, Italy

<sup>6</sup> Division of Pharmacology, Department of Neuroscience, Reproductive and Dentistry Sciences, School of Medicine, University of Naples "Federico II", 80131 Naples, Italy

<sup>7</sup> Center of Translational and Experimental Myology, IRCCS Istituto Giannina Gaslini, 16147 Genoa, Italy

<sup>8</sup> Institute of Biosciences and BioResources (IBBR), CNR, 80131 Naples, Italy

<sup>9</sup> IRCCS Casa Sollievo della Sofferenza, Bioinformatics Unit, 71013 San Giovanni Rotondo, Italy

<sup>10</sup> Department of Neuroscience, Rehabilitation, Ophthalmology, Genetics, Maternal and Child Health-DINOGMI, University of Genova, 16132 Genoa, Italy

<sup>11</sup> Unit of Neuromuscular and Neurodegenerative Disorders, Department of Neurosciences, Bambino Gesù Children's Hospital IRCCS, 00163 Roma, Italy

<sup>12</sup> Center for Motor Neuron Biology and Disease, Columbia University, New York, NY 10032, USA

<sup>13</sup> Department of Pathology and Cell Biology, Columbia University, New York, NY 10032, USA

<sup>14</sup> Department of Neurology, Columbia University, New York, NY 10032, USA

\* Correspondence: dursi@unisa.it (A.M.D.); usiello@ceinge.unina.it (A.U.);  
Tel.: +39-089-969-748 (A.M.D.); +39-081-3737-879 (A.U.)

† These authors contributed equally to this work.

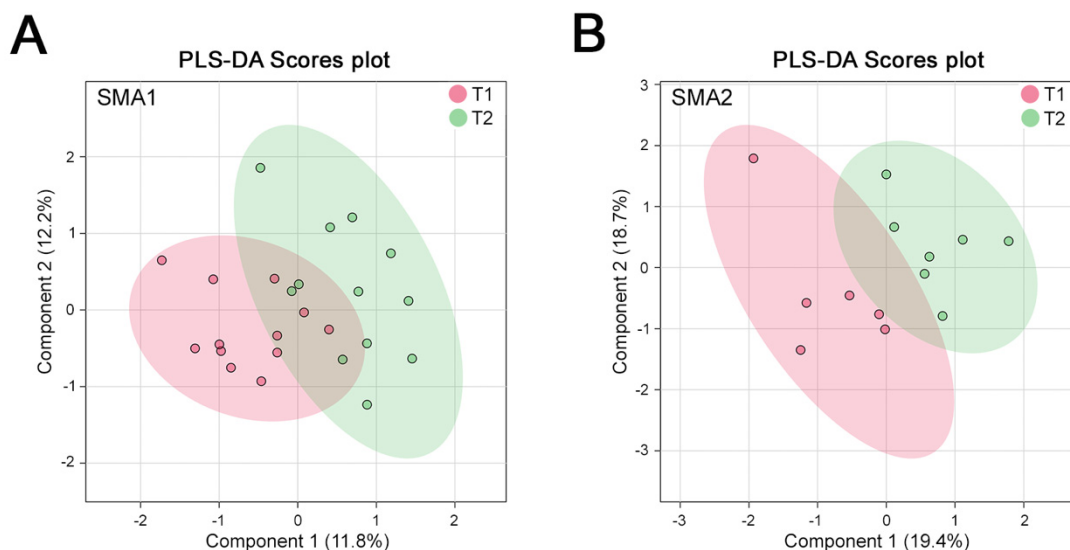

**Supplementary Figure S1. The CSF metabolomic profiles of SMA1 and SMA2 patients do not change between loading and maintenance phases of Nusinersen therapy.** (A,B) PLS-DA score scatter plots showing the metabolomic profiles of CSF from SMA1 (A) or SMA2 patients (B) at loading (T1) and maintenance (T2) phases of Nusinersen administration. PLS-DA was evaluated using cross validation (CV) analysis. The clusters analyses are reported in the Cartesian space that is described by the main components PC1:11.8% and PC2:12.2% (SMA1) (A), and PC1:19.4% and PC2:18.7% (SMA2) (B). CV tests performed according to PLS-DA statistical protocol reported Q2 negative values of -0.06 and -0.10 for the first and second principal component of SMA1 patients (A), and of -0.10 and -0.14 for the first and second principal component of SMA2 patients (B).

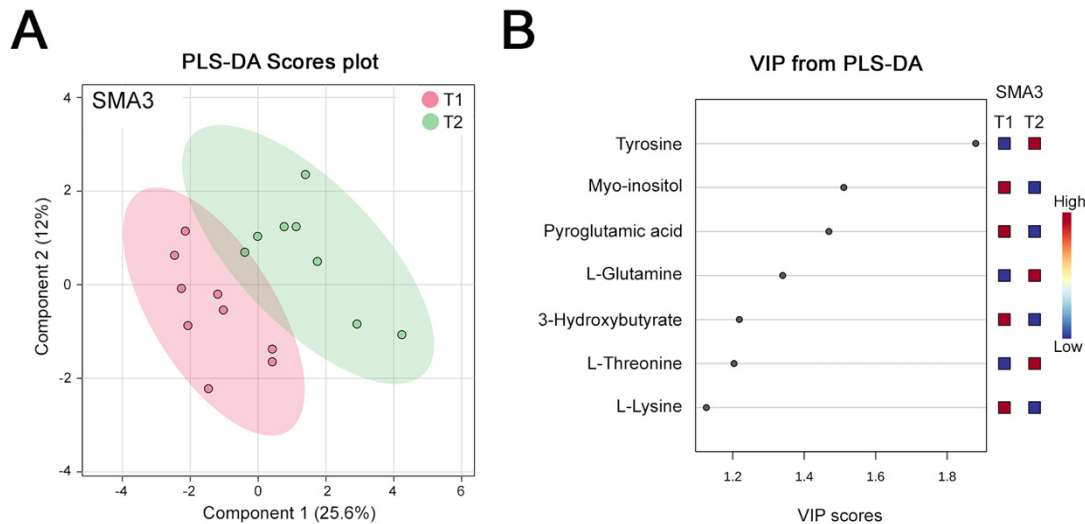

**Supplementary Figure S2. The CSF metabolomic profile of SMA3 patients differs between loading and maintenance phases of Nusinersen therapy.** (A) PLS-DA score scatter plots showing the metabolomic profiles of CSF from SMA3 patients at loading (T1) and maintenance (T2) phases of Nusinersen administration. PLS-DA was evaluated using cross validation (CV) analysis. The clusters analyses are reported in the Cartesian space that is described by the main components PC1:25.6% and PC2:12.0%. CV tests performed according to PLS-DA statistical protocol show a significant separation between T1 and T2 clusters (0.76 and 0.76 accuracy values on PC1 and PC2, respectively, and positive 0.25 and 0.33 Q2 indices). (B) VIP score graphs of the metabolites discriminating the CSF of SMA3 patients at T1 from that of the same patients at T2. Metabolites characterized by a VIP score > 1 are shown.



**Supplementary Table S1.** Biochemical and clinical characteristics of SMA patients before and after Nusinersen administration.

| SMA Type      | Withdrawal Time | CSF pH |                   | CSF Total Proteins (mg/L) |                  | Serum Creatinine (mg/dL) |                   | CHOP-INTEND |                  | HFMSE |                  |
|---------------|-----------------|--------|-------------------|---------------------------|------------------|--------------------------|-------------------|-------------|------------------|-------|------------------|
|               |                 | N      | Median [Min;Max]  | N                         | Median [Min;Max] | N                        | Median [Min;Max]  | N           | Median [Min;Max] | N     | Median [Min;Max] |
| All SMA (1-3) | T0              | 27     | 8.82 [8.15;9.27]  | 27                        | 197 [44;981]     | 23                       | 0.12 [0.05;0.5]   |             |                  |       |                  |
|               | T1              | 27     | 8.89 [8.42;9.29]  | 27                        | 176 [45;481]     | 8                        | 0.12 [0.09;0.9]   |             |                  |       |                  |
|               | T2              | 26     | 8.915 [8.44;9.44] | 26                        | 162 [68;434]     | 21                       | 0.12 [0.06;7]     |             |                  |       |                  |
| SMA1          | T0              | 12     | 8.82 [8.15;9]     | 12                        | 203 [44;650]     | 10                       | 0.105 [0.06;0.17] | 12          | 8.5 [0;52]       |       |                  |
|               | T1              | 12     | 8.915 [8.42;9.09] | 12                        | 237 [45;481]     | 6                        | 0.11 [0.09;0.9]   | 10          | 8.5 [0;64]       |       |                  |
|               | T2              | 12     | 8.915 [8.44;9.09] | 12                        | 153.5 [68;434]   | 10                       | 0.115 [0.06;7]    | 11          | 10 [0;64]        |       |                  |
| SMA2          | T0              | 7      | 8.86 [8.69;8.93]  | 7                         | 218 [92;416]     | 7                        | 0.1 [0.05;0.12]   |             |                  | 7     | 10 [2;16]        |
|               | T1              | 7      | 8.73 [8.64;9.04]  | 7                         | 165 [124;334]    | 0                        |                   |             |                  | 3     | 15 [2;23]        |
|               | T2              | 6      | 8.86 [8.7;9.25]   | 6                         | 164.5 [141;321]  | 6                        | 0.115 [0.08;0.14] |             |                  | 6     | 14.5 [2;18]      |
| SMA3          | T0              | 8      | 8.75 [8.32;9.27]  | 8                         | 175.5 [94;981]   | 6                        | 0.225 [0.18;0.5]  |             |                  | 8     | 37.5 [15;61]     |
|               | T1              | 8      | 8.915 [8.61;9.29] | 8                         | 160.5 [142;235]  | 2                        | 0.175 [0.16;0.19] |             |                  | 7     | 36 [17;62]       |
|               | T2              | 8      | 8.975 [8.7;9.44]  | 8                         | 151.5 [88;410]   | 5                        | 0.26 [0.1;0.34]   |             |                  | 8     | 44 [14;62]       |

CSF samples were collected at the time of the first Nusinersen injection (T0, baseline) as well as 64 (T1, loading phase) and 302 (T2, maintenance phase) days later, which correspond to the time of the fourth and sixth scheduled injection, respectively.

**Supplementary Table S2.** Cross validation of PLS-DA calculated on all SMA patients at T0 compared to T1 or T2.

| PLS-DA Cross Validation |          |       |          |       |
|-------------------------|----------|-------|----------|-------|
| All SMA                 |          |       |          |       |
|                         | T0 vs T1 |       | T0 vs T2 |       |
|                         | PC1      | PC2   | PC1      | PC2   |
| Value                   | 15.1%    | 7.2%  | 11.9%    | 11.6% |
| Accuracy                | 0.62     | 0.53  | 0.31     | 0.30  |
| R2                      | 0.24     | 0.43  | 0.11     | 0.20  |
| Q2                      | -0.02    | -0.31 | -0.44    | -0.84 |

Values are relative to principal component analysis percentage calculated on PC1 and PC2. The performance of the PLS-DA model was evaluated using the coefficient Q2 (using the 7-fold internal cross-validation method) and the coefficient R2, defining the variance predicted and explained by the model, respectively. In each cross-validation, the expected data was compared with the original data and the sum of errors squared was calculated. The prediction error was then summed up on all samples (Predicted Residual Sum of Squares or PRESS). For greater accuracy, the PRESS was divided by the initial sum of squares and subtracted from 1 to resemble the R2 scale.

**Supplementary Table S3.** Cross validation of PLS-DA calculated on SMA1, SMA2 or SMA3 patients at T0 compared to T1 or T2.

| PLS-DA CROSS VALIDATION |         |         |         |         |         |         |
|-------------------------|---------|---------|---------|---------|---------|---------|
| T0 vs T1                |         |         |         |         |         |         |
|                         | SMA1    |         | SMA2    |         | SMA3    |         |
|                         | PC1     | PC2     | PC1     | PC2     | PC1     | PC2     |
| Value                   | 17.8%   | 8.9%    | 12.5%   | 12.3%   | 10%     | 12.6%   |
| Accuracy                | 0.68182 | 0.77273 | 0.94444 | 1.0     | 0.68192 | 0.77272 |
| R2                      | 0.59232 | 0.75266 | 0.81983 | 0.9387  | 0.59532 | 0.75263 |
| Q2                      | 0.14321 | 0.43288 | 0.57742 | 0.82564 | 0.14321 | 0.43    |
| T0 vs T2                |         |         |         |         |         |         |
|                         | SMA1    |         | SMA2    |         | SMA3    |         |
|                         | PC1     | PC2     | PC1     | PC2     | PC1     | PC2     |
| Value                   | 15.5%   | 12.2%   | 17.7%   | 11.4%   | 19.5%   | 12.6%   |
| Accuracy                | 0.7083  | 0.6666  | 0.57    | 0.71    | 0.7381  | 0.7619  |
| R2                      | 0.4982  | 0.7007  | 0.2930  | 0.5385  | 0.3934  | 0.5523  |
| Q2                      | 0.0299  | 0.0302  | 0.23    | 0.29    | 0.16405 | 0.1780  |

Values are relative to principal component analysis percentage calculated on PC1 and PC2. The performance of the PLS-DA model was evaluated using the coefficient Q2 (using the 7-fold internal cross-validation method) and the coefficient R2, defining the variance predicted and explained by the model, respectively. In each cross-validation, the expected data was compared with the original data and the sum of errors squared was calculated. The prediction error was then summed up on all samples (Predicted Residual Sum of Squares or PRESS). For greater accuracy, the PRESS was divided by the initial sum of squares and subtracted from 1 to resemble the R2 scale.

**Supplementary Table S4.** Biochemical pathways affected by Nusinersen administration in SMA patients.

| SMA Type | Comparison | Pathway                                     | Total | Hits | Metabolites                                                                                      | p-Value | FDR   |
|----------|------------|---------------------------------------------|-------|------|--------------------------------------------------------------------------------------------------|---------|-------|
| SMA1     | T0-T1      | Phenylalanine and Tyrosine Metabolism       | 28    | 3    | Acetoacetic acid, L-Tyrosine, L-Phenylalanine                                                    | 0,007   | 0,179 |
|          |            | Glycolysis                                  | 25    | 2    | D-Glucose, Pyruvic acid                                                                          | 0,018   | 0,179 |
|          |            | Transfer of Acetyl Groups into Mitochondria | 22    | 3    | Citric acid, D-Glucose, Pyruvic acid                                                             | 0,019   | 0,179 |
|          |            | Sphingolipid Metabolism                     | 40    | 2    | D-Glucose, L-Serine                                                                              | 0,023   | 0,179 |
|          |            | Tryptophan Metabolism                       | 60    | 3    | Formic acid, L-Alanine, L-Tryptophan                                                             | 0,024   | 0,179 |
|          |            | Warburg Effect                              | 58    | 6    | Citric acid, D-Glucose, L-Lactic acid, Pyruvic acid, Succinic acid, L-Glutamine                  | 0,031   | 0,188 |
|          |            | Gluconeogenesis                             | 35    | 3    | D-Glucose, L-Lactic acid, Pyruvic acid                                                           | 0,031   | 0,188 |
|          |            | Valine, Leucine and Isoleucine Degradation  | 60    | 6    | (S)-3-Hydroxyisobutyric acid, Acetoacetic acid, L-Isoleucine, Succinic acid, L-Leucine, L-Valine | 0,039   | 0,188 |
|          |            | Glucose-Alanine Cycle                       | 13    | 3    | D-Glucose, L-Alanine, Pyruvic acid                                                               | 0,049   | 0,188 |
|          | T0-T2      | Glutathione Metabolism                      | 21    | 2    | L-Alanine, Pyroglutamic acid                                                                     | 0,008   | 0,158 |
|          |            | Arginine and Proline Metabolism             | 53    | 2    | Creatine, Succinic acid                                                                          | 0,012   | 0,158 |
|          |            | Citric Acid Cycle                           | 32    | 3    | Citric acid, Pyruvic acid, Succinic acid                                                         | 0,022   | 0,245 |
|          |            | Glutamate Metabolism                        | 49    | 4    | L-Alanine, Pyruvic acid, Succinic acid, L-Glutamine                                              | 0,036   | 0,271 |
|          |            | Ketone Body Metabolism                      | 13    | 3    | Acetoacetic acid, Succinic acid, Acetone                                                         | 0,038   | 0,271 |
|          |            | Carnitine Synthesis                         | 22    | 2    | L-Lysine, Succinic acid                                                                          | 0,039   | 0,271 |
|          |            | Butyrate Metabolism                         | 19    | 2    | Acetoacetic acid, Succinic acid                                                                  | 0,041   | 0,271 |
|          |            |                                             |       |      |                                                                                                  |         |       |
| SMA2     | T0-T1      | Valine, Leucine and Isoleucine Degradation  | 60    | 6    | (S)-3-Hydroxyisobutyric acid, Acetoacetic acid, L-Isoleucine, Succinic acid, L-Leucine, L-Valine | 0,002   | 0,100 |
|          |            | Ketone Body Metabolism                      | 13    | 3    | Acetoacetic acid, Succinic acid, Acetone                                                         | 0,009   | 0,235 |
|          |            | Fatty Acid Biosynthesis                     | 35    | 3    | Acetic acid, Acetoacetic acid, 3-Hydroxybutyric acid                                             | 0,012   | 0,235 |
|          |            | Propanoate Metabolism                       | 42    | 2    | 2-Hydroxybutyric acid, L-Valine                                                                  | 0,033   | 0,235 |
|          |            | Urea Cycle                                  | 29    | 3    | L-Alanine, Pyruvic acid, L-Glutamine                                                             | 0,043   | 0,235 |
|          |            | Selenoamino Acid Metabolism                 | 28    | 2    | L-Alanine, L-Serine                                                                              | 0,046   | 0,235 |
|          |            |                                             |       |      |                                                                                                  |         |       |
|          | T0-T2      | Phenylalanine and Tyrosine Metabolism       | 28    | 3    | Acetoacetic acid, L-Tyrosine, L-Phenylalanine                                                    | 0,003   | 0,158 |
|          |            | Tyrosine Metabolism                         | 72    | 2    | Acetoacetic acid, L-Tyrosine                                                                     | 0,007   | 0,158 |
|          |            | Ketone Body Metabolism                      | 13    | 3    | Acetoacetic acid, Succinic acid, Acetone                                                         | 0,014   | 0,186 |
|          |            | Fatty Acid Biosynthesis                     | 35    | 3    | Acetic acid, Acetoacetic acid, 3-Hydroxybutyric acid                                             | 0,044   | 0,484 |
|          |            |                                             |       |      |                                                                                                  |         |       |
| SMA3     | T0-T1      | Tyrosine Metabolism                         | 72    | 2    | Acetoacetic acid, L-Tyrosine                                                                     | 0,008   | 0,118 |
|          |            | Methionine Metabolism                       | 43    | 3    | Choline, L-Serine, L-Methionine                                                                  | 0,019   | 0,126 |
|          |            | Ammonia Recycling                           | 32    | 4    | L-Histidine, L-Serine, Pyruvic acid, L-Glutamine                                                 | 0,020   | 0,126 |
|          |            | Aspartate Metabolism                        | 35    | 2    | Acetic acid, L-Glutamine                                                                         | 0,025   | 0,126 |
|          |            | Glutamate Metabolism                        | 49    | 4    | L-Alanine, Pyruvic acid, Succinic acid, L-Glutamine                                              | 0,025   | 0,126 |
|          |            |                                             |       |      |                                                                                                  |         |       |
|          | T0-T2      | Glycine and Serine Metabolism               | 59    | 6    | Creatine, L-Alanine, L-Threonine, L-Serine, Pyruvic acid, L-Methionine                           | 0,006   | 0,117 |
|          |            | Ammonia Recycling                           | 32    | 4    | L-Histidine, L-Serine, Pyruvic acid, L-Glutamine                                                 | 0,007   | 0,117 |
|          |            | Phenylalanine and Tyrosine Metabolism       | 28    | 3    | Acetoacetic acid, L-Tyrosine, L-Phenylalanine                                                    | 0,017   | 0,119 |

Biochemical pathways were identified through Pathway Enrichment analysis in SMA1, SMA2 or SMA3 patients at loading (T1) or maintenance (T2) phases relative to baseline (T0) (T0-T1 and T0-T2 comparisons, respectively). Total is the total number of compounds in the pathway. The Hits is the actually matched number of metabolites from the user uploaded data. *p*-value is calculated from the enriched analysis. The false discovery rate (FDR) is the portion of false positives above the user-specified score threshold.



**Supplementary Table S5.** Regression analysis showing significant correlations of CHOP-INTEND or HFMSE with metabolites with VIP>1 in SMA1, SMA2 and SMA3 patients at T0 and T2. Significant correlations between clinical parameters and metabolites with a coefficient of Person  $\geq 0.70$  and  $p$  value  $< 0.01$  are reported.

|      |    |                   | CHOP-INTEND |                |                   | HFMSE    |                |
|------|----|-------------------|-------------|----------------|-------------------|----------|----------------|
|      |    | <i>Metabolite</i> | <i>r</i>    | <i>p-Value</i> | <i>Metabolite</i> | <i>r</i> | <i>p-Value</i> |
| SMA1 | T0 | -                 | -           | -              | -                 | -        | -              |
|      | T2 | 3-Hydroxybutyrate | -0.708      | 0.009          | -                 | -        | -              |
| SMA2 | T0 | -                 | -           | -              | L-Alanine         | 0.899    | <0.0001        |
|      |    | -                 | -           | -              | 3-Hydroxybutyrate | 0.754    | 0.002          |
|      | T2 | -                 | -           | -              | -                 | -        | -              |
| SMA3 | T0 | -                 | -           | -              | -                 | -        | -              |
|      | T2 | -                 | -           | -              | Valine            | 0.832    | <0.0001        |
